# Supplementary material for: Computational design and experimental characterisation of a stable human heparanase variant
Source: Royal Society of Chemistry journal article supplement (doi:10.1039/d1cb00239b), 2022-01-01
Supplement: d1cb00239b2.pdf [file d1cb00239b2.pdf]

## Computational design and experimental characterisation of a stable human heparanase variant

Cassidy Whitefield<sup>a†</sup>, Nansook Hong<sup>a†</sup>, Joshua A. Mitchell<sup>a</sup> and Colin J. Jackson<sup>a\*</sup>

<sup>a</sup> Research School of Chemistry, Australian National University, Canberra, ACT, 2601, Australia.

† Contributed equally to this work. \*To whom correspondence should be addressed: colin.jackson@anu.edu.au

### Supplementary Material

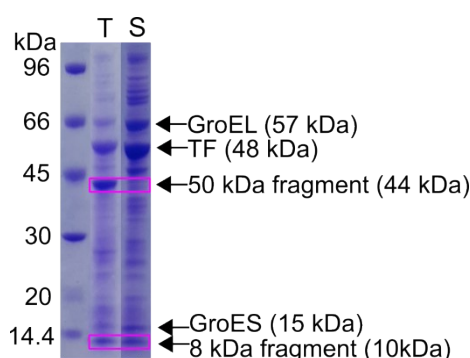

**Supplementary Figure 1.** Wild type human heparanase expression in *E. coli*. The 50 and 8 kDa subunits and chaperones<sup>28</sup> in total (annotated as T) and in soluble fraction (annotated as S) are shown with LMW protein marker (GE healthcare). 8 kDa subunit with N-terminal 6xHis-tag and 50 kDa subunit were amplified by PCR using gBlocks (IDT, **Supplementary Table 1**) and inserted into multiple cloning sites of pETDuet-1 coexpression vector (Novagen). The plasmid DNA was transformed into Shuffle T7 Express competent cells (NEB) together with chaperones in pACYC vector. Overnight seed culture from single colony was inoculated by 1% into LB media supplemented with ampicillin and chloramphenicol antibiotics. The culture was incubated at 37 °C for about 3-5 hours until the OD was about 0.8. 0.4 mM IPTG was added and further incubated for about 3 hours at 37 °C. The cell pellet was resuspended in 50 mM acetate buffer at pH 5 and lysed using BugBuster protein extraction reagent (Merck) for the solubility measurement.

**A**

|          |    |       |
|----------|----|-------|
| Design 1 | 1  | L197G |
|          | 2  | D234G |
|          | 3  | Q248H |
|          | 4  | I318T |
|          | 5  | L354G |
|          | 6  | K427D |
|          | 7  | L483H |
|          | 8  | L498Q |
|          | 9  | A540P |
| Design 2 | 10 | E244K |
|          | 11 | R273G |
| Design 3 | 12 | L230R |
|          | 13 | S322Q |
|          | 14 | H486D |
| Design 4 | 15 | M512K |
|          | 16 | N178K |
|          | 17 | S212A |
|          | 18 | R307L |
| Design 5 | 19 | S530A |
|          | 20 | S219D |
|          | 21 | S292A |
| Design 6 | 22 | A195S |
|          | 23 | F327L |
|          | 24 | S426Q |
|          | 25 | K477Q |
|          | 26 | E513P |
| Design 7 | 27 | D209K |
|          | 28 | F236Y |
|          | 29 | N238D |
|          | 30 | S240T |
|          | 31 | S321Q |
|          | 32 | K446R |
|          | 33 | S492H |
|          | 34 | S521T |

**B**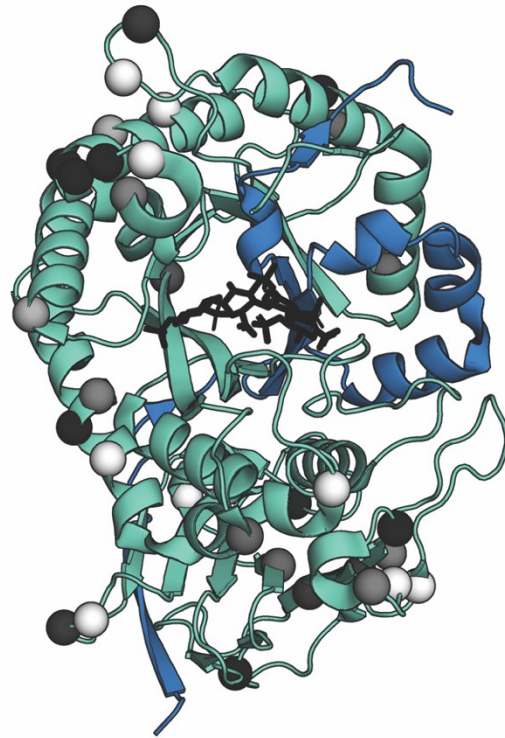

**Supplementary Figure 2.** Design of stable heparanase mutants from PROSS (**A**) the resulting mutations are shown for each design. (**B**) The crystal structure of heparanase (PDB ID: 5E9C) was used as template whereby 50 kDa subunit (cyan cartoon) was targeted with restriction on the residues contacting the ligand (black sticks) and the 8 kDa subunit (blue cartoon).

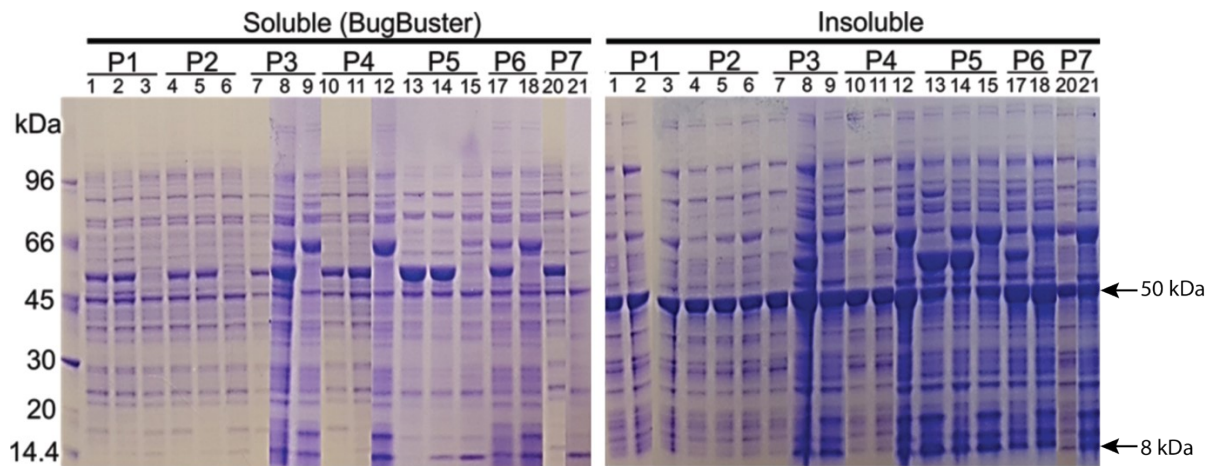

**Supplementary Figure 3.** Pross variant expression trials in *E. coli* SHuffle cells. P1-P7 plasmid DNA was transformed into Shuffle T7 Express competent cells (NEB) together with varying chaperones in pACYC vector. Skp+TF was tested in 1, 4, 7, 10 and 13. GroEL/ES+TF was tested in 2, 5, 8, 11, 14, 17, and 20. Skp + GroEL/ES was tested in 3, 6, 9, 12, 15, 18 and 21. LMW protein marker (GE healthcare) is shown on the left. Overnight seed culture from single colony was inoculated by 1% into LB media supplemented with ampicillin and chloramphenicol antibiotics. The culture was incubated at 37 °C for about 3-5 hours until the OD was about 0.8. 0.4 mM IPTG was added and further incubated for about 3 hours. The cell pellet was resuspended in 50 mM acetate buffer at pH 5 and lysed using BugBuster protein extraction reagent (Merck) for the solubility measurement.

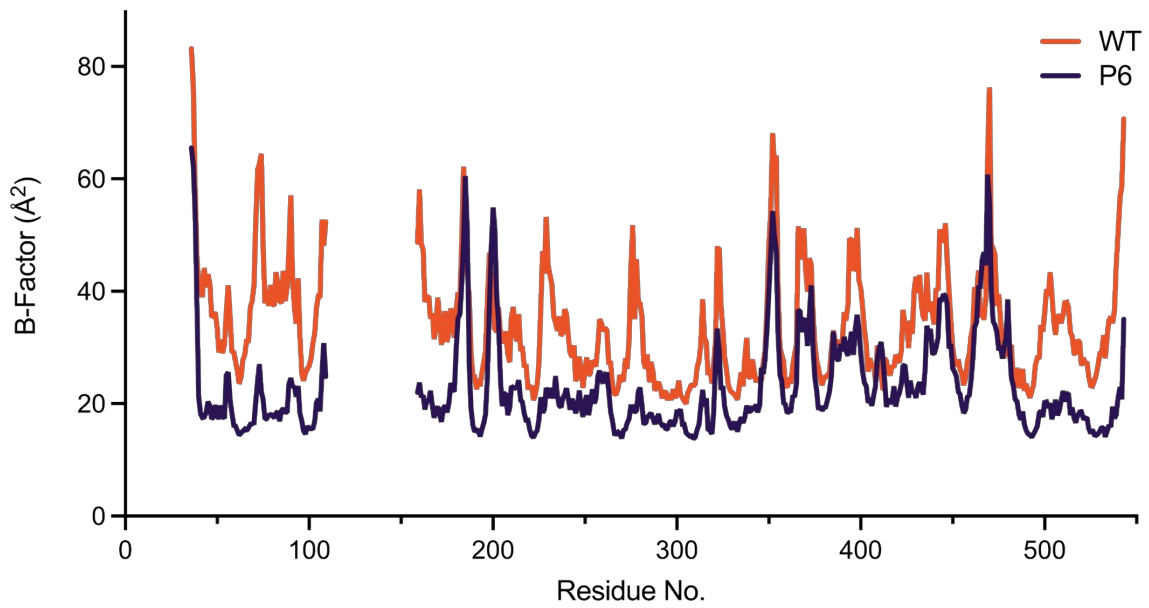

**Supplementary Figure 4:** Crystallographic B-Factors of WT HSPE and HSPE P6. Comparison between the B factors from the two structures (with different Wilson B-factors and resolution) show an overall decrease in magnitude of the B factors in the Mutant P6, yet the overall trend in terms of regions of high/low B-factors is very similar.

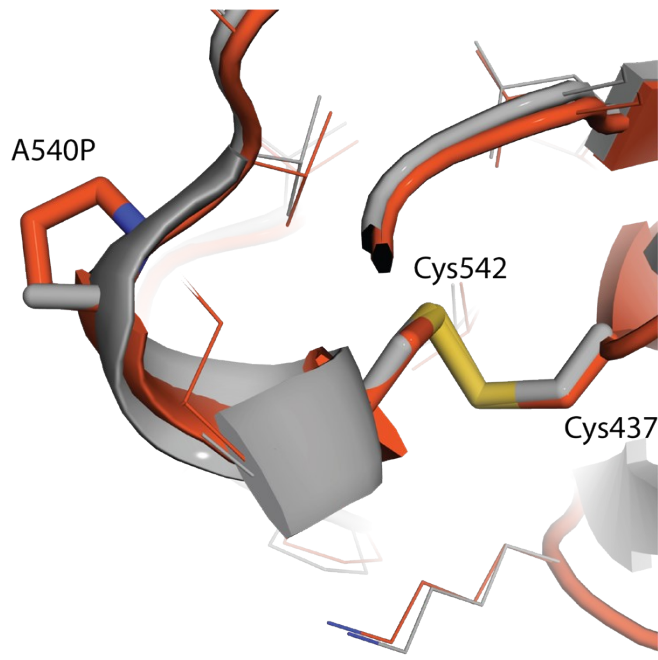

**Supplementary Figure 5:** The disulfide bond between Cys542 and Cys437 that is stabilised by A540P mutation, which is in a favourable conformation is the kinked loop preceding Cys542.

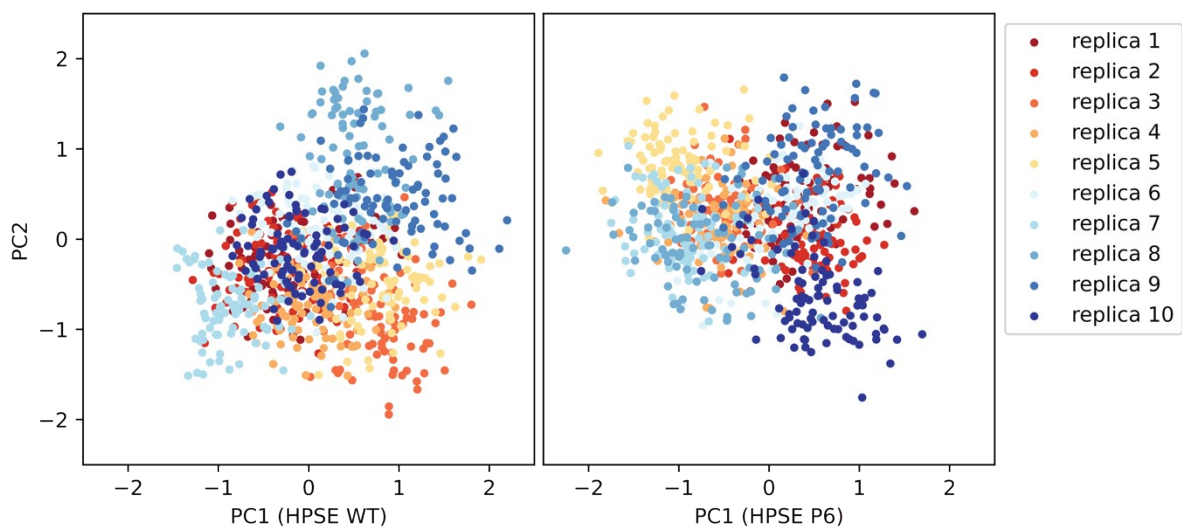

**Supplementary Figure 6:** Principal component analysis (PCA) sampling quality for WT and P6 simulations. Sampling shows that the 10 simulations sample a large range of conformational space for both WT and mutant replica simulations, and using all replica simulations is viable in the analysis.

**Supplementary Table 1. Nucleotide sequences of heparanase variants used for cloning**

| Name                                 | Sequences                                                                                                                                                                                                                                                                                                                                                                                                                                                                                                                                                                                                                                                                                                                                                                                                                                                                                                                                                                                                                                                                                                                                                                                                                                                                                                                                                                                                                           |
|--------------------------------------|-------------------------------------------------------------------------------------------------------------------------------------------------------------------------------------------------------------------------------------------------------------------------------------------------------------------------------------------------------------------------------------------------------------------------------------------------------------------------------------------------------------------------------------------------------------------------------------------------------------------------------------------------------------------------------------------------------------------------------------------------------------------------------------------------------------------------------------------------------------------------------------------------------------------------------------------------------------------------------------------------------------------------------------------------------------------------------------------------------------------------------------------------------------------------------------------------------------------------------------------------------------------------------------------------------------------------------------------------------------------------------------------------------------------------------------|
| 8 kDa subunit of wild type (gBlock)  | <p>CAGGATGTGGTCGATCTTGATTTCTTCACGCAGGAGCCTTTGCACCTTGTATCCCC<br/>           CTCATTTTTAAGCGTTACCATAGACGCAAACCTTGCCACTGACCCGCGCTTCTTAA<br/>           TCTTGCTTGGTAGTCCAAAGTTAAGAACGCTGGCGCGGGGGCTTAGTCCAGCATA<br/>           TCTGCGCTTTGGCGGAACGAAAACAGACTTCCTGATTTTTGATCCTAAAAAGGAA</p>                                                                                                                                                                                                                                                                                                                                                                                                                                                                                                                                                                                                                                                                                                                                                                                                                                                                                                                                                                                                                                                                                                                                               |
| 50 kDa subunit of wild type (gBlock) | <p>AAAAATTTAAGAACTCCACTTATAGCCGCAGTTCAGTCGACGTGCTGTACACCTT<br/>           CGCGAACTGTTCCGGGATTGGATTTGATATTTGGATTAAATGCATTGTTGCGCACGG<br/>           CGGATCTGCAGTGGAACCTCTAGTAACGCGCAATTATTGTTAGATTATTGTAGTTCCG<br/>           AAGGGCTACAATATATCGTGGGAATTGGGTAATGAGCCGAACAGCTTTTTGAAGAA<br/>           AGCCGACATCTTTATTAATGGGTCTCAGCTGGGCGAAGATTTTATACAACTTCACA<br/>           AGCTGTTACGCAAATCAACATTTAAGAACGCGAAGTTATATGGACCAGATGTTGGG<br/>           CAGCCACGTAGAAAGACCGCCAAGATGCTGAAAAGCTTCCTTAAAGCAGGAGGTG<br/>           AAGTGATTGACTCGGTGACCTGGCATCACTACTTAAACGGAAGAACAGCAACT<br/>           CGTGAGGATTTCTTGAACCCGGATGTCCTTGATATATTTATTTTCATCTGTACAAAA<br/>           GTCTTCCAAGTTGTAGAATCCACCAGACCTGGCAAAAAAGTGTGGTTAGGAGAGA<br/>           CTTCAAGCGCTTACGGCGGTGGTGCACCTCTTTTGTCCGACACCTTCGCGGCAGG<br/>           CTTTCATGTGGCTGGACAAATTGGGCTTAAGCGCGCGTATGGGGATCGAAGTGGTG<br/>           ATGCGGCAGGTATTCTTTGGCGCCGGAACTATCACCTGGTCGATGAAAATTTTGA<br/>           TCCTTTACCTGATTATTGGTTGTCATTAAGTTTAAAAAGTTGGTCGGGACAAAGGT<br/>           CCTTATGGCTTCTGTCCAGGGGAGTAAAAGAAGAAAATTGAGAGTTTACTTGCATT<br/>           GCACCAATACGGACAACCCGAGATATAAGGAAGGAGACTTGACCTTATACGCTATC<br/>           AATTTGCACAATGTTACGAAATATTTGCGTTTACCTTACCCATTCTCCAACAAACAA<br/>           GTTGACAAATACTTGCTGCGCCCTCTGGGTCCGCATGGCTTATTATCCAATCGGT<br/>           TCAGTTGAATGGCTTAACTCTGAAAATGGTAGATGATCAGACATTGCCACCATTGA<br/>           TGGAGAAA</p> |
| 50 kDa subunit of design (gBlock)    | <p>ccccatcttagtatattagttaagtataagaaggagatatacatATGAAAAAATTCAAAAACCTCGACGTAT<br/>           AGCCGGTCTTCTGTGGATGTGCTCTATACTTTTGCGAAGTGTTCGGGCCTGGACTT<br/>           AATCTTCGGCTTAAATGCACTGCTTCGGACTTCAGATGGGCAGTGGAAATTCTAGCA<br/>           ATGCTCAGCTCCTGCTCGATTACTGTGCCTCTAAAGGGTATAACATCGACTGGGAG<br/>           TTGGGCAACGAGCCAAATAGCTTCCGTAAAAAGGCTGGGATCTTCATCAACGGGT<br/>           CGCAATTAGGCAAGGACTTCATTCACCTTCACAACTGCTCCGGAAATCGACATTT<br/>           AAGAATGCGAAACTGTATGGCCCTGATGTAGGTCAACCGCGCGGGAAAACGGCCA<br/>           AAATGCTTAAATCGTTCCTGAAGGCGGGCGGCGAAGTCATTGATGCAGTAACATG<br/>           GCACCATTACTATTTGAATGGTTCGCACCGCCACCTTAGAAGATTTCTGAATCCGG<br/>           ACGTATTGGACACGTTTATTTCTCAGGTTCAAAGGTCTTGCAAGTTGTGCAATCG</p>                                                                                                                                                                                                                                                                                                                                                                                                                                                                                                                                                                                                                                                                                 |

ACCCGGCCTGGGAAGAAAGTTTGGCTCGGGGAGACAAGTTCCGCCTATGGCGGT  
GGCGCTCCTGGCCTCTCAGATACCTTTGCTGCTGGTTTCATGTGGCTTGATAAACT  
GGGCCTCTCCGCTCGCATGGGGATCGAAGTCGTGATGCGCCAAGTATTTTTTGGC  
GCTGGCAACTACCACCTCGTCGACGAAAACCTTCGATCCATTGCCTGACTACTGGCT  
GAGCCTCCTTTTCAAAAAGTTAGTTGGTACAAAGGTGTTGATGGCAAGTGTTTCAGG  
GTCAGGATCGCCGAAACTTCGCGTTTATCTCCATTGCACAAATACGGATAATCCT  
CGCTACAAAGAAGGCGACCTGACGCTCTATGCTATCAACCTCCATAACGTCACCA  
  
AGTATCTCCGCCTGCCATATCCTTTTAGTAATAAACAGGTGGATCAATATCTCTTGC  
GCCCTCATGGCCCTGATGGTTTACTGTCCAAGAGCGTGCAGTTGAATGGCCAGAC  
CCTCAAGATGGTTGATGACCAGACTTTGCCTCCTTTGAAGCCAAAACCACTGCGTC  
CGGGGAGCAGTCTTGGCCTGCCTGCCTTCTCCTACGCATTTTTTGTAAATTCGTAAC  
GCAAAGGTCCCAGCCTGCATCTGATAACTCGAGTCTGGTAAAGAAACCG



**Supplementary Table 2. Amino acid sequences of heparanase variants**

|                             |                                                                                                                                                                                                                                                                                                                                                                                                                                |
|-----------------------------|--------------------------------------------------------------------------------------------------------------------------------------------------------------------------------------------------------------------------------------------------------------------------------------------------------------------------------------------------------------------------------------------------------------------------------|
| 8 kDa subunit               | MGSSHHHHHSQDPNSSSQDVVDLDFFTQEPLHLVSPSFLSVTIDANLATDPRFLIL<br>LGSPKLRTLARGLSPAYLRFGGKTDFLIFDPKKE*                                                                                                                                                                                                                                                                                                                                |
| 50 kDa subunit of wild type | MKKFKNSTYSRSSVDVLYTFANC SGLDLIFGLNALLRTADLQWNSSNAQLLLDYCSS<br>KGYNISWELGNEPNSFLK KADIFINGSQLGEDFIQLHKLLRKSTFKNAKLYGPDVGQP<br>RRKTAKMLKSFLKAGGEVIDSVTWHHYLNGRTATREDFLNPVDLDFISSVQKVFQ<br>VVESTRP GKKVWLGETSSAYGGGAPLLSDTFAAGFMWLDKLGLSARMGIEVVMRQ<br>VFFGAGNYHLVDENFDPLPDYWLSLLFKKLVGTVL MASVQGSKRRLRVYLHCTN<br>TDNPRYKEGDLTLYAINLHNVTKYLR LPYPFSNKQVDKYLLRPLGPHGLLSKSVQLN<br>GLTLKMVDDQTL PPLMEKPLRPGSSLGLPAFSYSFFVIRNAKVAACI* |
| 50 kDa subunit of design    | MKKFKNSTYSRSSVDVLYTFAC SGLDLIFGLNALLRTSDGQWNSSNAQLLLDYCA<br>SKGYNIDWELGNEPNSFRKKAGIFINGSQLGKDFIHLHKLLRKSTFKNAKLYGPDVG<br>QPRGKTAKMLKSFLKAGGEVIDAVTWHHYLNGRTATLEDFLNPVDLDTFISVQKQV<br>LQVVESTRP GKKVWLGETSSAYGGGAPGLSDTFAAGFMWLDKLGLSARMGIEVVM<br>RQVFFGAGNYHLVDENFDPLPDYWLSLLFKKLVGTVL MASVQQDQRRKLRVYLH<br>CTNTDNPRYKEGDLTLYAINLHNVTKYLR LPYPFSNKQVDQYLLRPHGPDGLLSKSV<br>QLNGQTLKMVDDQTL PPLPKPLRPGSSLGLPAFSYAFFVIRNAKVPACI*  |

**Supplementary Table 3.** Data collection and refinement statistics

| PDB ID                              | 7RG8                                           |
|-------------------------------------|------------------------------------------------|
| <b>Data collection</b>              |                                                |
| Space group                         | P 2 <sub>1</sub> 2 <sub>1</sub> 2 <sub>1</sub> |
| Cell dimensions                     |                                                |
| $\alpha$ , $b$ , $c$ (Å)            | 59.78 76.09 124.43                             |
| $\alpha$ , $\beta$ , $\gamma$ (°)   | 90.00 90.00 90.00                              |
| Resolution (Å)                      | 47.01-1.30 (1.346-1.3)                         |
| $R_{\text{merge}}$                  | 0.07 (1.11)                                    |
| $I / \sigma I$                      | 11.82 (0.33)                                   |
| CC <sub>1/2</sub>                   | 0.998 (0.882)                                  |
| Completeness (%)                    | 99.78% (99.0%)                                 |
| Redundancy                          | 13.2 (11.3)                                    |
| <b>Refinement</b>                   |                                                |
| Resolution (Å)                      | 47.01-1.30 (1.346-1.3)                         |
| No. reflections                     | 139516 (13656)                                 |
| $R_{\text{work}} / R_{\text{free}}$ | 0.142/ 0.164                                   |
| No. atoms                           |                                                |
| Protein                             | 3660                                           |
| Ligand/ion                          | 11                                             |
| Water                               | 363                                            |
| $B$ -factors                        |                                                |
| Protein                             | 24.89                                          |
| Ligand/ion                          | 21.94                                          |
| Water                               | 41.23                                          |
| R.m.s. deviations                   |                                                |
| Bond lengths (Å)                    | 0.007                                          |
| Bond angles (°)                     | 1.01                                           |
| Ramachandran plot                   |                                                |
| Preferred (%)                       | 98.68                                          |
| Allowed (%)                         | 1.32                                           |
| Outliers (%)                        | 0.00                                           |

\*X-ray data were collected from single crystals. \*Values in parentheses are for highest-resolution shell.
